# Supplementary material for: Breastfeeding and subsequent risk of 24 types of maternal cancer: a cohort study of Chinese women
Source: Research Square preprint supplement (doi:10.21203/rs.3.rs-5470880/v1), 2025-04-28
Supplement: Supplementary file 1 [file 8997325c9e73665089a060c4.docx]

**eFigure 1. The flow chart of the included participants in this study**

**eFigure 2. The dose-response relationship of total breastfeeding duration with the risk of rare site-specific cancers**

**eTable 1. The definition and number of overall cancer and its specific-site cancers**

**eTable 2. Risk of developing** **rare site-specific cancers in relationship to history of breastfeeding baseline total breastfeeding duration**

**eTable 3. Risk of developing rare site-specific cancers in relationship to baseline total breastfeeding duration**

**eTable 4. Risk of developing rare site-specific cancers in relationship to breastfeeding behavior stratified by menopausal status**

**eTable 5. Sensitivity analysis for further adjusting for surgeries on the reproductive system among parous women (2012-2019)**

**eTable 6. Sensitivity analysis for including nulliparous female participants**

**eFigure 1. The flow chart of the included participants in this study
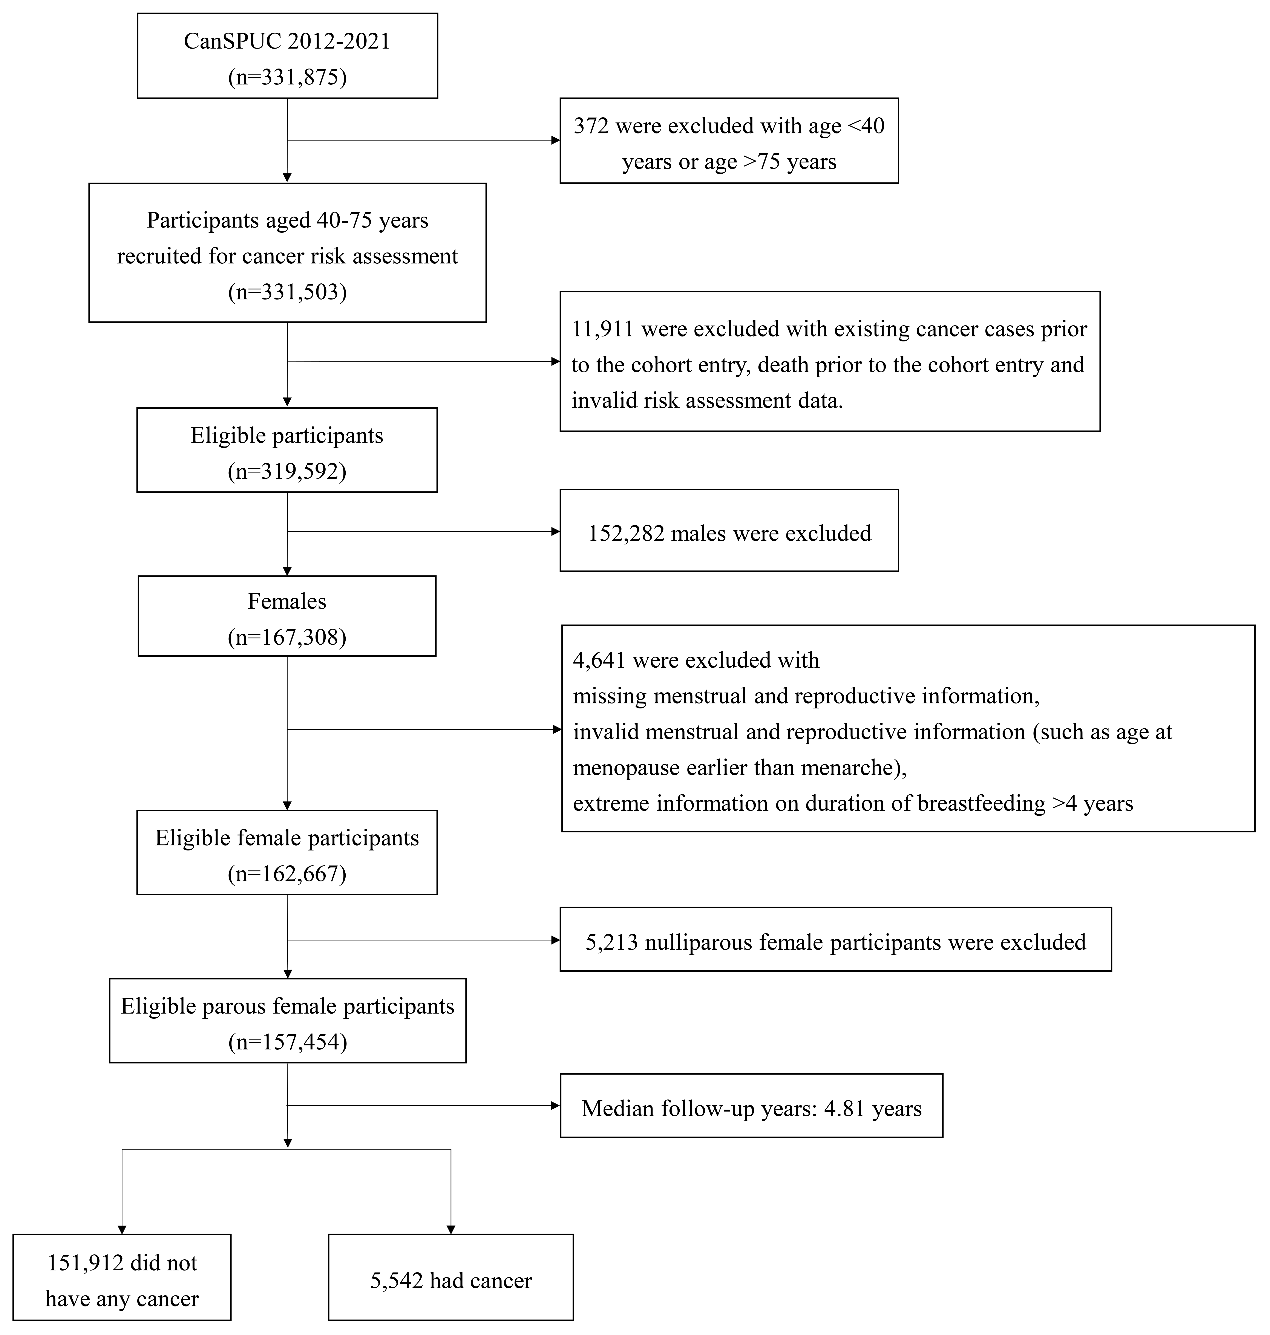
**

**eFigure 2. The dose-response relationship of total breastfeeding duration with the risk of rare site-specific cancers**

**

**

**eTable 1. The definition and number of overall cancer and its specific-site cancers**

|  | **ICD-10** | **n** |
| --- | --- | --- |
| Non-cancer | - | 151912 |
| Oral cavity and pharynx | C00-10, C12-14 | 69 |
| Nasopharynx | C11 | 49 |
| Oesophagus | C15 | 27 |
| Stomach | C16 | 165 |
| Colon-rectum | C18-21 | 574 |
| Liver | C22 | 190 |
| Gallbladder | C23-24 | 84 |
| Pancreas | C25 | 68 |
| Larynx | C32 | 14 |
| Lung | C33-34 | 804 |
| Other thoracic organs | C37-38 | 24 |
| Bone | C40-41 | 23 |
| Melanoma of skin | C43 | 26 |
| Breast | C50 | 1128 |
| Cervix | C53 | 407 |
| Uterus | C54-55 | 240 |
| Ovary | C56 | 135 |
| Prostate | C61 | - |
| Testis | C62 | - |
| Kidney | C64-66, C68 | 87 |
| Bladder | C67 | 50 |
| Brain | C70-72 | 271 |
| Thyroid | C73 | 472 |
| Lymphoma | C81-85, C88, C90, C96 | 157 |
| Leukaemia | C91-95 | 86 |
| All others | NA | 392 |
| All sites | C00-97, D32-33, D42-43, D45-47 | 5542 |

**eTable 2. Risk of developing rare site-specific cancers in relationship to history of breastfeeding baseline total breastfeeding duration.**

| **History of breastfeeding** | **Cases (n=5542)** | **Unadjusted model** |  | **Age-adjusted model** |  | **Multivariate-adjusted model** |
| --- | --- | --- | --- | --- | --- | --- |
| **HR (95%CI)** |  | **HR (95%CI)** |  | **HR (95%CI)** |
| Oral cavity and pharynx (C00-10, C12-14) |  |  |  |  |  |  |
| No | 4 | Ref. |  | Ref. |  | Ref. |
| Yes | 65 | 1.48 (0.54-4.07) |  | 1.45 (0.53-3.97) |  | 1.39 (0.50-3.86) |
| Nasopharynx (C11) |  |  |  |  |  |  |
| No | 8 | Ref. |  | Ref. |  | Ref. |
| No | 41 | 0.49 (0.23-1.04) |  | 0.49 (0.23-1.04) |  | 0.53 (0.24-1.16) |
| Oesophagus (C15) |  |  |  |  |  |  |
| No | 1 | Ref. |  | Ref. |  | Ref. |
| Yes | 26 | 2.47 (0.33-18.21) |  | 2.29 (0.31-16.87) |  | 2.57 (0.34-19.22) |
| Stomach (C16) |  |  |  |  |  |  |
| No | 10 | Ref. |  | Ref. |  | Ref. |
| Yes | 155 | 1.45 (0.77-2.76) |  | 1.40 (0.74-2.65) |  | 1.51 (0.79-2.89) |
| Liver (C22) |  |  |  |  |  |  |
| No | 18 | Ref. |  | Ref. |  | Ref. |
| Yes | 172 | 0.89 (0.55-1.45) |  | 0.86 (0.53-1.39) |  | 0.89 (0.54-1.46) |
| Gallbladder (C23-24) |  |  |  |  |  |  |
| No | 5 | Ref. |  | Ref. |  | Ref. |
| Yes | 79 | 1.45 (0.59-3.57) |  | 1.35 (0.55-3.34) |  | 1.51 (0.60-3.76) |
| Pancreas (C25) |  |  |  |  |  |  |
| No | 8 | Ref. |  | Ref. |  | Ref. |
| Yes | 60 | 0.68 (0.33-1.43) |  | 0.63 (0.30-1.32) |  | 0.58 (0.28-1.23) |
| Larynx (C32) |  |  |  |  |  |  |
| No | 1 | Ref. |  | Ref. |  | Ref. |
| Yes | 13 | 1.21 (0.16-9.30) |  | 1.15 (0.15-8.82) |  | 1.38 (0.17-11.07) |
| Other thoracic organs (C37-38) |  |  |  |  |  |  |
| No | 1 | Ref. |  | Ref. |  | Ref. |
| Yes | 23 | 2.10 (0.28-15.57) |  | 1.98 (0.27-14.70) |  | 2.22 (0.30-16.73) |
| Bone (C40-41) |  |  |  |  |  |  |
| No | 2 | Ref. |  | Ref. |  | Ref. |
| Yes | 21 | 0.94 (0.22-4.02) |  | 0.89 (0.21-3.81) |  | 0.83 (0.19-3.60) |
| Melanoma of skin (C43) |  |  |  |  |  |  |
| No | 4 | Ref. |  | Ref. |  | Ref. |
| Yes | 22 | 0.52 (0.18-1.51) |  | 0.50 (0.17-1.44) |  | 0.53 (0.18-1.59) |
| Ovary (C56) |  |  |  |  |  |  |
| No | 10 | Ref. |  | Ref. |  | Ref. |
| Yes | 125 | 1.14 (0.60-2.18) |  | 1.14 (0.60-2.17) |  | 1.19 (0.62-2.29) |
| Kidney (C64-66, C68) |  |  |  |  |  |  |
| No | 9 | Ref. |  | Ref. |  | Ref. |
| Yes | 78 | 0.79 (0.40-1.58) |  | 0.75 (0.38-1.50) |  | 0.80 (0.40-1.62) |
| Bladder (C67) |  |  |  |  |  |  |
| No | 2 | Ref. |  | Ref. |  | Ref. |
| Yes | 48 | 2.18 (0.53-8.99) |  | 2.04 (0.50-8.41) |  | 2.17 (0.52-9.02) |
| Lymphoma (C81-85, C88, C90, C96) |  |  |  |  |  |  |
| No | 14 | Ref. |  | Ref. |  | Ref. |
| Yes | 143 | 0.94 (0.54-1.63) |  | 0.90 (0.52-1.55) |  | 0.91 (0.52-1.58) |
| Leukaemia (C91-95) |  |  |  |  |  |  |
| No | 4 | Ref. |  | Ref. |  | Ref. |
| Yes | 82 | 1.87 (0.69-5.12) |  | 1.81 (0.66-4.93) |  | 1.87 (0.68-5.13) |

Unadjusted model: no covariates were controlled for.

Age-adjusted model: only age at enrollment (continuous) was controlled for.

Multivariate-adjusted model: age-adjusted model + educational level (low, medium, high), marital status (married, others), smoking status (never, current, ever), alcohol drinking status (never, ever), regular exercise (no, yes), BMI (underweight, normal, overweight, obese), family history of cancer (no, yes), hypertension (no, yes), diabetes (no, yes), age at menarche (<13, 13, 14, >14 years), and menopause status (no, yes).

Abbreviations: HR, hazard ratio; CI, confidence interval.

**eTable 3. Risk of developing rare site-specific cancers in relationship to baseline total breastfeeding duration.**

| **Site-specific cancers** | **Total breastfeeding duration** | **Cases**  **(n=5542)** | **Unadjusted model** | **Age-adjusted model** | **Multivariate-adjusted model** |
| --- | --- | --- | --- | --- | --- |
| **HR (95%CI)** | **HR (95%CI)** | **HR (95%CI)** |
| Oral cavity and pharynx (C00-10, C12-14) | Continuous (per 12 months) | 69 | 0.80 (0.51-1.26) | 0.75 (0.48-1.17) | 0.70 (0.44-1.12) |
|  | Multi-categorical (month) |  |  |  |  |
|  | 0 | 4 | Ref. | Ref. | Ref. |
|  | 1-6 | 11 | 1.95 (0.62-6.14) | 1.97 (0.63-6.20) | 1.99 (0.63-6.28) |
|  | 7-12 | 42 | 1.46 (0.52-4.07) | 1.45 (0.52-4.04) | 1.38 (0.49-3.89) |
|  | >12 | 12 | 1.26 (0.41-3.92) | 1.15 (0.37-3.58) | 1.08 (0.34-3.40) |
|  | *P* for trend |  | 0.874 | 0.706 | 0.590 |
| Nasopharynx (C11) | Continuous (per 12 months) | 49 | 1.03 (0.63-1.67) | 1.02 (0.62-1.67) | 0.98 (0.61-1.59) |
|  | Multi-categorical (month) |  |  |  |  |
|  | 0 | 8 | Ref. | Ref. | Ref. |
|  | 1-6 | 6 | 0.56 (0.19-1.61) | 0.56 (0.19-1.61) | 0.60 (0.21-1.75) |
|  | 7-12 | 24 | 0.43 (0.19-0.97) | 0.43 (0.19-0.97) | 0.49 (0.22-1.12) |
|  | >12 | 11 | 0.61 (0.24-1.51) | 0.61 (0.24-1.51) | 0.61 (0.24-1.56) |
|  | *P* for trend |  | 0.259 | 0.253 | 0.283 |
| Oesophagus (C15) | Continuous (per 12 months) | 27 | 1.07 (0.57-2.03) | 0.90 (0.48-1.71) | 0.98 (0.51-1.88) |
|  | Multi-categorical (month) |  |  |  |  |
|  | 0 | 1 | Ref. | Ref. | Ref. |
|  | 1-6 | 3 | 2.21 (0.23-21.28) | 2.27 (0.24-21.84) | 2.38 (0.25-23.04) |
|  | 7-12 | 19 | 2.77 (0.37-20.69) | 2.66 (0.36-19.89) | 2.96 (0.39-22.49) |
|  | >12 | 4 | 1.73 (0.19-15.52) | 1.37 (0.15-12.29) | 1.62 (0.18-14.81) |
|  | *P* for trend |  | 0.729 | 0.982 | 0.834 |
| Stomach (C16) | Continuous (per 12 months) | 165 | 1.13 (0.87-1.45) | 1.01 (0.78-1.30) | 1.03 (0.80-1.34) |
|  | Multi-categorical (month) |  |  |  |  |
|  | 0 | 10 | Ref. | Ref. | Ref. |
|  | 1-6 | 18 | 1.32 (0.61-2.87) | 1.35 (0.62-2.93) | 1.44 (0.66-3.14) |
|  | 7-12 | 103 | 1.48 (0.77-2.83) | 1.46 (0.76-2.79) | 1.57 (0.81-3.04) |
|  | >12 | 34 | 1.45 (0.72-2.93) | 1.26 (0.62-2.55) | 1.37 (0.67-2.82) |
|  | *P* for trend |  | 0.321 | 0.654 | 0.497 |
| Liver (C22) | Continuous (per 12 months) | 190 | 0.93 (0.72-1.20) | 0.82 (0.64-1.06) | 0.79 (0.61-1.03) |
|  | Multi-categorical (month) |  |  |  |  |
|  | 0 | 18 | Ref. | Ref. | Ref. |
|  | 1-6 | 30 | 1.22 (0.68-2.18) | 1.25 (0.70-2.24) | 1.32 (0.73-2.38) |
|  | 7-12 | 100 | 0.79 (0.48-1.30) | 0.78 (0.47-1.29) | 0.81 (0.49-1.35) |
|  | >12 | 42 | 1.02 (0.59-1.77) | 0.87 (0.50-1.51) | 0.86 (0.49-1.51) |
|  | *P* for trend |  | 0.562 | 0.209 | 0.192 |
| Gallbladder (C23-24) | Continuous (per 12 months) | 84 | 1.82 (1.36-2.42) | 1.54 (1.15-2.06) | 1.51 (1.12-2.02) |
|  | Multi-categorical (month) |  |  |  |  |
|  | 0 | 5 | Ref. | Ref. | Ref. |
|  | 1-6 | 8 | 1.14 (0.37-3.49) | 1.17 (0.38-3.59) | 1.13 (0.36-3.59) |
|  | 7-12 | 42 | 1.17 (0.46-2.97) | 1.14 (0.45-2.88) | 1.33 (0.52-3.41) |
|  | >12 | 29 | 2.46 (0.95-6.37) | 1.98 (0.77-5.14) | 2.19 (0.83-5.76) |
|  | *P* for trend |  | 0.013 | 0.062 | 0.039 |
| Pancreas (C25) | Continuous (per 12 months) | 68 | 1.25 (0.85-1.84) | 1.02 (0.70-1.49) | 0.94 (0.63-1.41) |
|  | Multi-categorical (month) |  |  |  |  |
|  | 0 | 8 | Ref. | Ref. | Ref. |
|  | 1-6 | 8 | 0.71 (0.27-1.88) | 0.74 (0.28-1.97) | 0.74 (0.28-1.99) |
|  | 7-12 | 37 | 0.64 (0.30-1.38) | 0.62 (0.29-1.33) | 0.58 (0.27-1.25) |
|  | >12 | 15 | 0.80 (0.34-1.88) | 0.61 (0.26-1.45) | 0.52 (0.22-1.25) |
|  | *P* for trend |  | 0.654 | 0.264 | 0.129 |
| Larynx (C32) | Continuous (per 12 months) | 14 | 0.87 (0.33-2.26) | 0.77 (0.30-1.98) | 0.75 (0.29-1.92) |
|  | Multi-categorical (month) |  |  |  |  |
|  | 0 | 1 | Ref. | Ref. | Ref. |
|  | 1-6 | 3 | 2.21 (0.23-21.27) | 2.26 (0.23-21.73) | 2.87 (0.29-28.54) |
|  | 7-12 | 6 | 0.86 (0.10-7.18) | 0.84 (0.10-7.01) | 1.02 (0.12-8.85) |
|  | >12 | 4 | 1.68 (0.19-15.03) | 1.41 (0.16-12.73) | 1.54 (0.16-14.61) |
|  | *P* for trend |  | 0.959 | 0.885 | 0.898 |
| Other thoracic organs (C37-38) | Continuous (per 12 months) | 24 | 1.14 (0.58-2.24) | 0.98 (0.50-1.91) | 1.15 (0.58-2.30) |
|  | Multi-categorical (month) |  |  |  |  |
|  | 0 | 1 | Ref. | Ref. | Ref. |
|  | 1-6 | 4 | 2.84 (0.32-25.41) | 2.92 (0.33-26.19) | 2.70 (0.30-24.37) |
|  | 7-12 | 13 | 1.81 (0.24-13.80) | 1.76 (0.23-13.50) | 1.96 (0.25-15.23) |
|  | >12 | 6 | 2.58 (0.31-21.42) | 2.10 (0.25-17.50) | 2.64 (0.31-22.55) |
|  | *P* for trend |  | 0.580 | 0.805 | 0.530 |
| Bone (C40-41) | Continuous (per 12 months) | 23 | 1.66 (0.93-2.98) | 1.45 (0.81-2.60) | 1.32 (0.72-2.42) |
|  | Multi-categorical (month) |  |  |  |  |
|  | 0 | 2 | Ref. | Ref. | Ref. |
|  | 1-6 | 3 | 1.04 (0.17-6.21) | 1.05 (0.18-6.30) | 1.01 (0.17-6.07) |
|  | 7-12 | 10 | 0.68 (0.15-3.11) | 0.67 (0.15-3.04) | 0.63 (0.14-2.95) |
|  | >12 | 8 | 1.70 (0.36-8.00) | 1.43 (0.30-6.74) | 1.24 (0.25-6.04) |
|  | *P* for trend |  | 0.422 | 0.588 | 0.731 |
| Melanoma of skin (C43) | Continuous (per 12 months) | 26 | 0.78 (0.38-1.63) | 0.69 (0.34-1.43) | 0.72 (0.34-1.52) |
|  | Multi-categorical (month) |  |  |  |  |
|  | 0 | 4 | Ref. | Ref. | Ref. |
|  | 1-6 | 4 | 0.74 (0.18-2.96) | 0.76 (0.19-3.05) | 0.78 (0.19-3.16) |
|  | 7-12 | 12 | 0.43 (0.14-1.34) | 0.43 (0.14-1.32) | 0.47 (0.15-1.52) |
|  | >12 | 6 | 0.65 (0.18-2.31) | 0.55 (0.15-1.96) | 0.52 (0.13-2.03) |
|  | *P* for trend |  | 0.377 | 0.253 | 0.248 |
| Ovary (C56) | Continuous (per 12 months) | 135 | 0.81 (0.59-1.12) | 0.80 (0.58-1.11) | 0.83 (0.60-1.15) |
|  | Multi-categorical (month) |  |  |  |  |
|  | 0 | 10 | Ref. | Ref. | Ref. |
|  | 1-6 | 21 | 1.49 (0.70-3.17) | 1.49 (0.70-3.17) | 1.50 (0.70-3.19) |
|  | 7-12 | 87 | 1.21 (0.63-2.33) | 1.21 (0.63-2.33) | 1.26 (0.65-2.44) |
|  | >12 | 17 | 0.72 (0.33-1.58) | 0.71 (0.32-1.56) | 0.75 (0.34-1.66) |
|  | *P* for trend |  | 0.199 | 0.185 | 0.273 |
| Kidney (C64-66, C68) | Continuous (per 12 months) | 87 | 1.15 (0.81-1.64) | 1.01 (0.72-1.44) | 1.03 (0.72-1.47) |
|  | Multi-categorical (month) |  |  |  |  |
|  | 0 | 9 | Ref. | Ref. | Ref. |
|  | 1-6 | 4 | 0.32 (0.10-1.02) | 0.32 (0.10-1.04) | 0.34 (0.11-1.12) |
|  | 7-12 | 55 | 0.85 (0.42-1.72) | 0.83 (0.41-1.69) | 0.90 (0.44-1.84) |
|  | >12 | 19 | 0.89 (0.40-1.97) | 0.75 (0.34-1.67) | 0.81 (0.36-1.82) |
|  | *P* for trend |  | 0.538 | 0.890 | 0.797 |
| Bladder (C67) | Continuous (per 12 months) | 50 | 1.33 (0.86-2.05) | 1.13 (0.73-1.73) | 1.18 (0.76-1.83) |
|  | Multi-categorical (month) |  |  |  |  |
|  | 0 | 2 | Ref. | Ref. | Ref. |
|  | 1-6 | 6 | 2.13 (0.43-10.58) | 2.19 (0.44-10.86) | 2.17 (0.44-10.79) |
|  | 7-12 | 28 | 1.95 (0.46-8.19) | 1.89 (0.45-7.95) | 2.02 (0.48-8.57) |
|  | >12 | 14 | 2.92 (0.66-12.85) | 2.35 (0.53-10.38) | 2.59 (0.58-11.60) |
|  | *P* for trend |  | 0.149 | 0.334 | 0.248 |
| Lymphoma (C81-85, C88, C90, C96) | Continuous (per 12 months) | 157 | 1.01 (0.77-1.33) | 0.88 (0.67-1.16) | 0.90 (0.68-1.20) |
|  | Multi-categorical (month) |  |  |  |  |
|  | 0 | 14 | Ref. | Ref. | Ref. |
|  | 1-6 | 18 | 0.92 (0.46-1.86) | 0.94 (0.47-1.90) | 0.98 (0.48-1.97) |
|  | 7-12 | 93 | 0.94 (0.53-1.64) | 0.92 (0.52-1.61) | 0.91 (0.52-1.61) |
|  | >12 | 32 | 0.98 (0.52-1.84) | 0.82 (0.44-1.54) | 0.86 (0.45-1.62) |
|  | *P* for trend |  | 0.988 | 0.508 | 0.575 |
| Leukaemia (C91-95) | Continuous (per 12 months) | 86 | 1.23 (0.87-1.73) | 1.11 (0.78-1.56) | 1.13 (0.80-1.61) |
|  | Multi-categorical (month) |  |  |  |  |
|  | 0 | 4 | Ref. | Ref. | Ref. |
|  | 1-6 | 9 | 1.60 (0.49-5.20) | 1.63 (0.50-5.28) | 1.61 (0.50-5.26) |
|  | 7-12 | 56 | 1.96 (0.71-5.40) | 1.93 (0.70-5.32) | 2.00 (0.72-5.57) |
|  | >12 | 17 | 1.79 (0.60-5.32) | 1.56 (0.52-4.65) | 1.65 (0.55-4.97) |
|  | *P* for trend |  | 0.320 | 0.536 | 0.440 |

Unadjusted model: no covariates were controlled for.

Age-adjusted model: only age at enrollment (continuous) was controlled for.

Multivariate-adjusted model: age-adjusted model + educational level (low, medium, high), marital status (married, others), smoking status (never, current, ever), alcohol drinking status (never, ever), regular exercise (no, yes), BMI (underweight, normal, overweight, obese), family history of cancer (no, yes), hypertension (no, yes), diabetes (no, yes), age at menarche (<13, 13, 14, >14 years), and menopause status (no, yes).

Abbreviations: HR, hazard ratio; CI, confidence interval.

**eTable 4. Risk of developing rare site-specific cancers in relationship to breastfeeding behavior stratified by menopausal status.**

| **Site-specific cancers** | **Breastfeeding behavior** | **Premenopausal** | | **Postmenopausal** | | ***P*int** |
| --- | --- | --- | --- | --- | --- | --- |
| **Cases** | **HR (95%CI)** | **Cases** | **HR (95%CI)** |
| Oral cavity and pharynx (C00-10, C12-14) |  |  |  |  |  |  |
|  | History of breastfeeding |  |  |  |  |  |
|  | No | 1 | Ref. | 3 | Ref. |  |
|  | Yes | 18 | 1.70 (0.22-12.93) | 47 | 1.26 (0.39-4.09) | 0.755 |
|  | Total breastfeeding duration  (per 12 months) | 19 | 0.96 (0.36-2.52) | 50 | 0.64 (0.38-1.09) | 0.461 |
| Nasopharynx (C11) |  |  |  |  |  |  |
|  | History of breastfeeding |  |  |  |  |  |
|  | No | 3 | Ref. | 5 | Ref. |  |
|  | Yes | 9 | 0.30 (0.08-1.16) | 32 | 0.67 (0.26-1.77) | 0.445 |
|  | Total breastfeeding duration  (per 12 months) | 12 | 0.91 (0.25-3.38) | 37 | 0.97 (0.58-1.63) | 0.865 |
| Oesophagus (C15) |  |  |  |  |  |  |
|  | History of breastfeeding |  |  |  |  |  |
|  | No | 0 | Ref. | 1 | Ref. |  |
|  | Yes | 3 | NA | 23 | 2.23 (0.29-16.84) | 0.998 |
|  | Total breastfeeding duration  (per 12 months) | 3 | 6.01 (1.46-24.70) | 24 | 0.79 (0.38-1.65) | 0.037 |
| Stomach (C16) |  |  |  |  |  |  |
|  | History of breastfeeding |  |  |  |  |  |
|  | No | 2 | Ref. | 8 | Ref. |  |
|  | Yes | 26 | 1.52 (0.36-6.51) | 129 | 1.51 (0.73-3.11) | 0.993 |
|  | Total breastfeeding duration  (per 12 months) | 28 | 1.26 (0.60-2.65) | 137 | 1.00 (0.76-1.32) | 0.676 |
| Liver (C22) |  |  |  |  |  |  |
|  | History of breastfeeding |  |  |  |  |  |
|  | No | 4 | Ref. | 14 | Ref. |  |
|  | Yes | 25 | 0.71 (0.24-2.06) | 147 | 0.95 (0.54-1.65) | 0.621 |
|  | Total breastfeeding duration  (per 12 months) | 29 | 0.60 (0.26-1.36) | 161 | 0.82 (0.63-1.08) | 0.474 |
| Gallbladder (C23-24) |  |  |  |  |  |  |
|  | History of breastfeeding |  |  |  |  |  |
|  | No | 1 | Ref. | 4 | Ref. |  |
|  | Yes | 7 | 0.99 (0.12-8.52) | 72 | 1.63 (0.59-4.50) | 0.579 |
|  | Total breastfeeding duration  (per 12 months) | 8 | 1.21 (0.36-4.07) | 76 | 1.55 (1.14-2.10) | 0.719 |
| Pancreas (C25) |  |  |  |  |  |  |
|  | History of breastfeeding |  |  |  |  |  |
|  | No | 1 | Ref. | 7 | Ref. |  |
|  | Yes | 3 | 0.33 (0.03-3.17) | 57 | 0.61 (0.27-1.34) | 0.584 |
|  | Total breastfeeding duration  (per 12 months) | 4 | 0.15 (0.01-1.76) | 64 | 1.00 (0.67-1.49) | 0.105 |
| Larynx (C32) |  |  |  |  |  |  |
|  | History of breastfeeding |  |  |  |  |  |
|  | No | 0 | Ref. | 1 | Ref. |  |
|  | Yes | 2 | NA | 11 | 1.04 (0.13-8.38) | 0.999 |
|  | Total breastfeeding duration  (per 12 months) | 2 | 12.62 (2.69-59.25) | 12 | 0.37 (0.11-1.22) | 0.002 |
| Other thoracic organs (C37-38) |  |  |  |  |  |  |
|  | History of breastfeeding |  |  |  |  |  |
|  | No | 0 | Ref. | 1 | Ref. |  |
|  | Yes | 5 | NA | 18 | 1.58 (0.21-12.05) | 0.998 |
|  | Total breastfeeding duration  (per 12 months) | 5 | 0.64 (0.08-5.32) | 19 | 1.21 (0.58-2.50) | 0.637 |
| Bone (C40-41) |  |  |  |  |  |  |
|  | History of breastfeeding |  |  |  |  |  |
|  | No | 0 | Ref. | 2 | Ref. |  |
|  | Yes | 2 | NA | 19 | 0.74 (0.17-3.25) | 0.998 |
|  | Total breastfeeding duration  (per 12 months) | 2 | 0.77 (0.03-18.13) | 21 | 1.32 (0.72-2.44) | 0.700 |
| Melanoma of skin (C43) |  |  |  |  |  |  |
|  | History of breastfeeding |  |  |  |  |  |
|  | No | 0 | Ref. | 4 | Ref. |  |
|  | Yes | 3 | NA | 19 | 0.44 (0.15-1.35) | 0.999 |
|  | Total breastfeeding duration  (per 12 months) | 3 | 2.42 (0.20-28.63) | 23 | 0.66 (0.30-1.45) | 0.367 |
| Ovary (C56) |  |  |  |  |  |  |
|  | History of breastfeeding |  |  |  |  |  |
|  | No | 3 | Ref. | 7 | Ref. |  |
|  | Yes | 39 | 1.51 (0.46-4.96) | 86 | 1.06 (0.48-2.31) | 0.765 |
|  | Total breastfeeding duration  (per 12 months) | 42 | 0.76 (0.38-1.49) | 93 | 0.85 (0.59-1.24) | 0.674 |
| Kidney (C64-66, C68) |  |  |  |  |  |  |
|  | History of breastfeeding |  |  |  |  |  |
|  | No | 3 | Ref. | 6 | Ref. |  |
|  | Yes | 11 | 0.39 (0.11-1.39) | 67 | 1.01 (0.43-2.36) | 0.259 |
|  | Total breastfeeding duration  (per 12 months) | 14 | 0.58 (0.18-1.81) | 73 | 1.09 (0.76-1.58) | 0.342 |
| Bladder (C67) |  |  |  |  |  |  |
|  | History of breastfeeding |  |  |  |  |  |
|  | No | 0 | Ref. | 2 | Ref. |  |
|  | Yes | 6 | NA | 42 | 1.82 (0.44-7.62) | 0.997 |
|  | Total breastfeeding duration  (per 12 months) | 6 | 4.03 (1.29-12.64) | 44 | 1.02 (0.64-1.65) | 0.148 |
| Lymphoma (C81-85, C88, C90, C96) |  |  |  |  |  |  |
|  | History of breastfeeding |  |  |  |  |  |
|  | No | 1 | Ref. | 13 | Ref. |  |
|  | Yes | 25 | 2.08 (0.28-15.49) | 118 | 0.82 (0.46-1.47) | 0.250 |
|  | Total breastfeeding duration  (per 12 months) | 26 | 0.54 (0.21-1.39) | 131 | 0.95 (0.71-1.27) | 0.402 |
| Leukaemia (C91-95) |  |  |  |  |  |  |
|  | History of breastfeeding |  |  |  |  |  |
|  | No | 3 | Ref. | 1 | Ref. |  |
|  | Yes | 17 | 0.54 (0.15-1.90) | 65 | 5.53 (0.76-40.00) | 0.068 |
|  | Total breastfeeding duration  (per 12 months) | 20 | 0.93 (0.34-2.54) | 66 | 1.14 (0.79-1.66) | 0.610 |

The Cox regression model adjusted for age at enrollment (continuous), educational level (low, medium, high), marital status (married, others), smoking status (never, current, ever), alcohol drinking status (never, ever), regular exercise (no, yes), BMI (underweight, normal, overweight, obese), family history of cancer (no, yes), hypertension (no, yes), diabetes (no, yes), and age at menarche (<13, 13, 14, >14 years), and menopause status (no, yes).

Abbreviations: HR, hazard ratio; CI, confidence interval; NA, not applicable; *P*int, *P* for interaction effect.

**eTable 5. Sensitivity analysis for further adjusting for surgeries on the reproductive system among parous women (2012-2019)**

| Site-specific cancers | History of breastfeeding | |  | Total breastfeeding duration | | |
| --- | --- | --- | --- | --- | --- | --- |
|  | Multi-categorical (month) | | Continuous  (per 12 months) |
|  | HR (95%CI) |  |  | HR (95%CI) | HR (95%CI) |
| Oral cavity and pharynx (C00-10, C12-14) |  |  |  |  |  |  |
|  | No | Ref. |  | 0 | Ref. |  |
|  | Yes | 2.68 (0.65-11.05) |  | 1-6 | 3.57 (0.78-16.36) | 0.80 (0.50-1.26) |
|  |  |  |  | 7-12 | 2.69 (0.65-11.23) |  |
|  |  |  |  | >12 | 2.13 (0.47-9.64) |  |
| Nasopharynx (C11) |  |  |  |  |  |  |
|  | No | Ref. |  | 0 | Ref. |  |
|  | Yes | 0.62 (0.26-1.50) |  | 1-6 | 0.75 (0.24-2.34) | 1.13 (0.69-1.84) |
|  |  |  |  | 7-12 | 0.53 (0.21-1.35) |  |
|  |  |  |  | >12 | 0.78 (0.28-2.17) |  |
| Oesophagus (C15) |  |  |  |  |  |  |
|  | No | Ref. |  | 0 | Ref. |  |
|  | Yes | 2.26 (0.30-16.99) |  | 1-6 | 2.21 (0.23-21.44) | 0.99 (0.50-1.96) |
|  |  |  |  | 7-12 | 2.52 (0.33-19.26) |  |
|  |  |  |  | >12 | 1.56 (0.17-14.29) |  |
| Stomach (C16) |  |  |  |  |  |  |
|  | No | Ref. |  | 0 | Ref. |  |
|  | Yes | 1.66 (0.81-3.41) |  | 1-6 | 1.42 (0.60-3.36) | 1.10 (0.84-1.44) |
|  |  |  |  | 7-12 | 1.72 (0.83-3.58) |  |
|  |  |  |  | >12 | 1.63 (0.74-3.57) |  |
| Colon-rectum (C18-21) |  |  |  |  |  |  |
|  | No | Ref. |  | 0 | Ref. |  |
|  | Yes | 1.03 (0.75-1.41) |  | 1-6 | 1.24 (0.85-1.80) | 0.89 (0.76-1.03) |
|  |  |  |  | 7-12 | 1.01 (0.73-1.40) |  |
|  |  |  |  | >12 | 0.93 (0.65-1.33) |  |
| Liver (C22) |  |  |  |  |  |  |
|  | No | Ref. |  | 0 | Ref. |  |
|  | Yes | 0.92 (0.55-1.52) |  | 1-6 | 1.38 (0.76-2.52) | 0.81 (0.62-1.05) |
|  |  |  |  | 7-12 | 0.83 (0.49-1.41) |  |
|  |  |  |  | >12 | 0.87 (0.48-1.55) |  |
| Gallbladder (C23-24) |  |  |  |  |  |  |
|  | No | Ref. |  | 0 | Ref. |  |
|  | Yes | 1.62 (0.59-4.48) |  | 1-6 | 1.15 (0.32-4.08) | 1.66 (1.22-2.25) |
|  |  |  |  | 7-12 | 1.37 (0.48-3.87) |  |
|  |  |  |  | >12 | 2.60 (0.90-7.54) |  |
| Pancreas (C25) |  |  |  |  |  |  |
|  | No | Ref. |  | 0 | Ref. |  |
|  | Yes | 0.58 (0.27-1.22) |  | 1-6 | 0.74 (0.28-1.99) | 0.88 (0.58-1.33) |
|  |  |  |  | 7-12 | 0.58 (0.27-1.27) |  |
|  |  |  |  | >12 | 0.50 (0.21-1.21) |  |
| Larynx (C32) |  |  |  |  |  |  |
|  | No | Ref. |  | 0 | Ref. |  |
|  | Yes | 1.43 (0.18-11.70) |  | 1-6 | 2.90 (0.29-29.19) | 0.76 (0.30-1.94) |
|  |  |  |  | 7-12 | 1.05 (0.12-9.28) |  |
|  |  |  |  | >12 | 1.60 (0.17-15.34) |  |
| Lung (C33-34) |  |  |  |  |  |  |
|  | No | Ref. |  | 0 | Ref. |  |
|  | Yes | 1.08 (0.83-1.41) |  | 1-6 | 1.15 (0.83-1.59) | 0.95 (0.84-1.07) |
|  |  |  |  | 7-12 | 1.08 (0.82-1.42) |  |
|  |  |  |  | >12 | 1.04 (0.77-1.41) |  |
| Other thoracic organs (C37-38) |  |  |  |  |  |  |
|  | No | Ref. |  | 0 | Ref. |  |
|  | Yes | 2.08 (0.28-15.74) |  | 1-6 | 2.59 (0.29-23.35) | 1.06 (0.50-2.26) |
|  |  |  |  | 7-12 | 1.88 (0.24-14.67) |  |
|  |  |  |  | >12 | 2.28 (0.26-20.10) |  |
| Bone (C40-41) |  |  |  |  |  |  |
|  | No | Ref. |  | 0 | Ref. |  |
|  | Yes | 0.83 (0.19-3.62) |  | 1-6 | 1.00 (0.17-6.01) | 1.32 (0.72-2.43) |
|  |  |  |  | 7-12 | 0.63 (0.14-2.95) |  |
|  |  |  |  | >12 | 1.25 (0.26-6.07) |  |
| Melanoma of skin (C43) |  |  |  |  |  |  |
|  | No | Ref. |  | 0 | Ref. |  |
|  | Yes | 0.50 (0.17-1.50) |  | 1-6 | 0.75 (0.18-3.04) | 0.72 (0.34-1.55) |
|  |  |  |  | 7-12 | 0.44 (0.14-1.40) |  |
|  |  |  |  | >12 | 0.51 (0.13-1.99) |  |
| Breast (C50) |  |  |  |  |  |  |
|  | No | Ref. |  | 0 | Ref. |  |
|  | Yes | 0.84 (0.68-1.02) |  | 1-6 | 0.88 (0.68-1.14) | 0.88 (0.79-0.99) |
|  |  |  |  | 7-12 | 0.83 (0.67-1.02) |  |
|  |  |  |  | >12 | 0.83 (0.65-1.06) |  |
| Cervix (C53) |  |  |  |  |  |  |
|  | No | Ref. |  | 0 | Ref. |  |
|  | Yes | 1.11 (0.77-1.62) |  | 1-6 | 0.95 (0.59-1.53) | 1.06 (0.88-1.27) |
|  |  |  |  | 7-12 | 1.13 (0.77-1.65) |  |
|  |  |  |  | >12 | 1.20 (0.78-1.83) |  |
| Uterus (C54-55) |  |  |  |  |  |  |
|  | No | Ref. |  | 0 | Ref. |  |
|  | Yes | 1.10 (0.66-1.81) |  | 1-6 | 0.74 (0.38-1.44) | 1.11 (0.88-1.41) |
|  |  |  |  | 7-12 | 1.18 (0.71-1.97) |  |
|  |  |  |  | >12 | 1.08 (0.61-1.92) |  |
| Ovary (C56) |  |  |  |  |  |  |
|  | No | Ref. |  | 0 | Ref. |  |
|  | Yes | 1.29 (0.65-2.56) |  | 1-6 | 1.55 (0.70-3.41) | 0.84 (0.61-1.17) |
|  |  |  |  | 7-12 | 1.38 (0.69-2.78) |  |
|  |  |  |  | >12 | 0.79 (0.34-1.81) |  |
| Kidney (C64-66, C68) |  |  |  |  |  |  |
|  | No | Ref. |  | 0 | Ref. |  |
|  | Yes | 0.84 (0.40-1.76) |  | 1-6 | 0.28 (0.08-1.08) | 1.08 (0.75-1.56) |
|  |  |  |  | 7-12 | 0.96 (0.45-2.05) |  |
|  |  |  |  | >12 | 0.81 (0.34-1.92) |  |
| Bladder (C67) |  |  |  |  |  |  |
|  | No | Ref. |  | 0 | Ref. |  |
|  | Yes | 2.10 (0.51-8.73) |  | 1-6 | 2.10 (0.42-10.46) | 1.25 (0.80-1.95) |
|  |  |  |  | 7-12 | 1.90 (0.45-8.07) |  |
|  |  |  |  | >12 | 2.68 (0.60-11.99) |  |
| Brain (C70-72) |  |  |  |  |  |  |
|  | No | Ref. |  | 0 | Ref. |  |
|  | Yes | 1.15 (0.71-1.84) |  | 1-6 | 1.03 (0.57-1.86) | 1.05 (0.86-1.29) |
|  |  |  |  | 7-12 | 1.16 (0.72-1.88) |  |
|  |  |  |  | >12 | 1.18 (0.70-2.00) |  |
| Thyroid (C73) |  |  |  |  |  |  |
|  | No | Ref. |  | 0 | Ref. |  |
|  | Yes | 0.97 (0.70-1.33) |  | 1-6 | 1.13 (0.77-1.67) | 0.82 (0.68-0.99) |
|  |  |  |  | 7-12 | 0.98 (0.70-1.36) |  |
|  |  |  |  | >12 | 0.78 (0.52-1.16) |  |
| Lymphoma (C81-85, C88, C90, C96) |  |  |  |  |  |  |
|  | No | Ref. |  | 0 | Ref. |  |
|  | Yes | 0.90 (0.50-1.60) |  | 1-6 | 1.01 (0.49-2.07) | 0.88 (0.65-1.19) |
|  |  |  |  | 7-12 | 0.91 (0.50-1.65) |  |
|  |  |  |  | >12 | 0.80 (0.41-1.55) |  |
| Leukaemia (C91-95) |  |  |  |  |  |  |
|  | No | Ref. |  | 0 | Ref. |  |
|  | Yes | 2.34 (0.73-7.46) |  | 1-6 | 1.85 (0.49-6.97) | 1.23 (0.86-1.75) |
|  |  |  |  | 7-12 | 2.50 (0.77-8.05) |  |
|  |  |  |  | >12 | 2.23 (0.64-7.69) |  |
| All others (NA) |  |  |  |  |  |  |
|  | No | Ref. |  | 0 | Ref. |  |
|  | Yes | 1.16 (0.78-1.72) |  | 1-6 | 0.99 (0.60-1.63) | 1.05 (0.88-1.25) |
|  |  |  |  | 7-12 | 1.21 (0.81-1.81) |  |
|  |  |  |  | >12 | 1.12 (0.72-1.75) |  |
| All sites (C00-97, D32-33, D42-43, D45-47) |  |  |  |  |  |  |
|  | No | Ref. |  | 0 | Ref. |  |
|  | Yes | 1.02 (0.92-1.12) |  | 1-6 | 1.05 (0.93-1.19) | 0.96 (0.91-1.01) |
|  |  |  |  | 7-12 | 1.02 (0.92-1.13) |  |
|  |  |  |  | >12 | 0.98 (0.88-1.10) |  |

The Cox regression model adjusted for age at enrollment (continuous), educational level (low, medium, high), marital status (married, others), smoking status (never, current, ever), alcohol drinking status (never, ever), regular exercise (no, yes), BMI (underweight, normal, overweight, obese), family history of cancer (no, yes), hypertension (no, yes), diabetes (no, yes), and age at menarche (<13, 13, 14, >14 years), menopause status (no, yes), and surgeries on the reproductive system (no, yes).

Abbreviations: HR, hazard ratio; CI, confidence interval.

**eTable 6. Sensitivity analysis for including nulliparous female participants**

| Site-specific cancers | History of breastfeeding | |  | Total breastfeeding duration | | |
| --- | --- | --- | --- | --- | --- | --- |
|  | Multi-categorical (month) | | Continuous  (per 12 months) |
|  | HR (95%CI) |  |  | HR (95%CI) | HR (95%CI) |
| Oral cavity and pharynx (C00-10, C12-14) |  |  |  |  |  |  |
|  | No | Ref. |  | 0 | Ref. |  |
|  | Yes | 1.47 (0.59-3.70) |  | 1-6 | 2.11 (0.73-6.11) | 0.74 (0.48-1.14) |
|  |  |  |  | 7-12 | 1.47 (0.57-3.75) |  |
|  |  |  |  | >12 | 1.13 (0.39-3.25) |  |
| Nasopharynx (C11) |  |  |  |  |  |  |
|  | No | Ref. |  | 0 | Ref. |  |
|  | Yes | 0.45 (0.23-0.87) |  | 1-6 | 0.51 (0.19-1.38) | 0.87 (0.54-1.40) |
|  |  |  |  | 7-12 | 0.41 (0.20-0.83) |  |
|  |  |  |  | >12 | 0.52 (0.22-1.21) |  |
| Oesophagus (C15) |  |  |  |  |  |  |
|  | No | Ref. |  | 0 | Ref. |  |
|  | Yes | 3.13 (0.42-23.38) |  | 1-6 | 2.90 (0.30-28.08) | 1.03 (0.55-1.94) |
|  |  |  |  | 7-12 | 3.62 (0.48-27.39) |  |
|  |  |  |  | >12 | 1.98 (0.22-18.01) |  |
| Stomach (C16) |  |  |  |  |  |  |
|  | No | Ref. |  | 0 | Ref. |  |
|  | Yes | 1.56 (0.86-2.82) |  | 1-6 | 1.49 (0.72-3.10) | 1.06 (0.83-1.37) |
|  |  |  |  | 7-12 | 1.62 (0.89-2.97) |  |
|  |  |  |  | >12 | 1.42 (0.73-2.78) |  |
| Colon-rectum (C18-21) |  |  |  |  |  |  |
|  | No | Ref. |  | 0 | Ref. |  |
|  | Yes | 1.05 (0.80-1.37) |  | 1-6 | 1.26 (0.90-1.77) | 0.89 (0.77-1.02) |
|  |  |  |  | 7-12 | 1.05 (0.79-1.38) |  |
|  |  |  |  | >12 | 0.93 (0.67-1.28) |  |
| Liver (C22) |  |  |  |  |  |  |
|  | No | Ref. |  | 0 | Ref. |  |
|  | Yes | 1.03 (0.65-1.65) |  | 1-6 | 1.53 (0.87-2.70) | 0.84 (0.66-1.08) |
|  |  |  |  | 7-12 | 0.94 (0.58-1.53) |  |
|  |  |  |  | >12 | 1.01 (0.59-1.73) |  |
| Gallbladder (C23-24) |  |  |  |  |  |  |
|  | No | Ref. |  | 0 | Ref. |  |
|  | Yes | 1.15 (0.55-2.41) |  | 1-6 | 0.87 (0.31-2.40) | 1.43 (1.07-1.91) |
|  |  |  |  | 7-12 | 1.02 (0.47-2.19) |  |
|  |  |  |  | >12 | 1.66 (0.74-3.70) |  |
| Pancreas (C25) |  |  |  |  |  |  |
|  | No | Ref. |  | 0 | Ref. |  |
|  | Yes | 0.61 (0.31-1.21) |  | 1-6 | 0.78 (0.30-1.99) | 0.93 (0.63-1.36) |
|  |  |  |  | 7-12 | 0.61 (0.30-1.24) |  |
|  |  |  |  | >12 | 0.54 (0.24-1.23) |  |
| Larynx (C32) |  |  |  |  |  |  |
|  | No | Ref. |  | 0 | Ref. |  |
|  | Yes | 1.62 (0.21-12.74) |  | 1-6 | 3.34 (0.34-32.67) | 0.80 (0.32-1.97) |
|  |  |  |  | 7-12 | 1.20 (0.14-10.25) |  |
|  |  |  |  | >12 | 1.81 (0.20-16.82) |  |
| Lung (C33-34) |  |  |  |  |  |  |
|  | No | Ref. |  | 0 | Ref. |  |
|  | Yes | 0.95 (0.77-1.19) |  | 1-6 | 1.00 (0.75-1.33) | 0.94 (0.84-1.06) |
|  |  |  |  | 7-12 | 0.95 (0.76-1.19) |  |
|  |  |  |  | >12 | 0.94 (0.73-1.21) |  |
| Other thoracic organs (C37-38) |  |  |  |  |  |  |
|  | No | Ref. |  | 0 | Ref. |  |
|  | Yes | 1.48 (0.34-6.43) |  | 1-6 | 1.87 (0.34-10.35) | 1.09 (0.56-2.15) |
|  |  |  |  | 7-12 | 1.30 (0.29-5.89) |  |
|  |  |  |  | >12 | 1.74 (0.34-8.91) |  |
| Bone (C40-41) |  |  |  |  |  |  |
|  | No | Ref. |  | 0 | Ref. |  |
|  | Yes | 0.52 (0.17-1.53) |  | 1-6 | 0.64 (0.14-2.90) | 1.15 (0.62-2.13) |
|  |  |  |  | 7-12 | 0.39 (0.12-1.26) |  |
|  |  |  |  | >12 | 0.78 (0.23-2.68) |  |
| Melanoma of skin (C43) |  |  |  |  |  |  |
|  | No | Ref. |  | 0 | Ref. |  |
|  | Yes | 0.51 (0.19-1.39) |  | 1-6 | 0.77 (0.21-2.91) | 0.69 (0.33-1.42) |
|  |  |  |  | 7-12 | 0.46 (0.16-1.34) |  |
|  |  |  |  | >12 | 0.50 (0.14-1.78) |  |
| Breast (C50) |  |  |  |  |  |  |
|  | No | Ref. |  | 0 | Ref. |  |
|  | Yes | 0.76 (0.64-0.90) |  | 1-6 | 0.79 (0.63-1.00) | 0.84 (0.75-0.93) |
|  |  |  |  | 7-12 | 0.76 (0.64-0.90) |  |
|  |  |  |  | >12 | 0.73 (0.59-0.90) |  |
| Cervix (C53) |  |  |  |  |  |  |
|  | No | Ref. |  | 0 | Ref. |  |
|  | Yes | 1.15 (0.83-1.60) |  | 1-6 | 0.99 (0.64-1.53) | 1.08 (0.91-1.28) |
|  |  |  |  | 7-12 | 1.16 (0.83-1.62) |  |
|  |  |  |  | >12 | 1.26 (0.86-1.84) |  |
| Uterus (C54-55) |  |  |  |  |  |  |
|  | No | Ref. |  | 0 | Ref. |  |
|  | Yes | 1.06 (0.69-1.63) |  | 1-6 | 0.68 (0.37-1.25) | 1.10 (0.89-1.37) |
|  |  |  |  | 7-12 | 1.15 (0.74-1.77) |  |
|  |  |  |  | >12 | 1.07 (0.65-1.77) |  |
| Ovary (C56) |  |  |  |  |  |  |
|  | No | Ref. |  | 0 | Ref. |  |
|  | Yes | 1.23 (0.68-2.25) |  | 1-6 | 1.56 (0.76-3.17) | 0.85 (0.62-1.17) |
|  |  |  |  | 7-12 | 1.30 (0.70-2.39) |  |
|  |  |  |  | >12 | 0.78 (0.37-1.65) |  |
| Kidney (C64-66, C68) |  |  |  |  |  |  |
|  | No | Ref. |  | 0 | Ref. |  |
|  | Yes | 0.90 (0.46-1.76) |  | 1-6 | 0.39 (0.12-1.24) | 1.04 (0.74-1.47) |
|  |  |  |  | 7-12 | 1.01 (0.51-2.01) |  |
|  |  |  |  | >12 | 0.90 (0.41-1.98) |  |
| Bladder (C67) |  |  |  |  |  |  |
|  | No | Ref. |  | 0 | Ref. |  |
|  | Yes | 1.15 (0.45-2.94) |  | 1-6 | 1.17 (0.36-3.87) | 1.06 (0.69-1.64) |
|  |  |  |  | 7-12 | 1.08 (0.41-2.83) |  |
|  |  |  |  | >12 | 1.35 (0.47-3.83) |  |
| Brain (C70-72) |  |  |  |  |  |  |
|  | No | Ref. |  | 0 | Ref. |  |
|  | Yes | 1.11 (0.74-1.67) |  | 1-6 | 1.06 (0.62-1.80) | 1.00 (0.82-1.22) |
|  |  |  |  | 7-12 | 1.14 (0.75-1.73) |  |
|  |  |  |  | >12 | 1.07 (0.67-1.71) |  |
| Thyroid (C73) |  |  |  |  |  |  |
|  | No | Ref. |  | 0 | Ref. |  |
|  | Yes | 0.87 (0.66-1.14) |  | 1-6 | 1.01 (0.71-1.42) | 0.81 (0.68-0.97) |
|  |  |  |  | 7-12 | 0.87 (0.66-1.16) |  |
|  |  |  |  | >12 | 0.73 (0.52-1.04) |  |
| Lymphoma (C81-85, C88, C90, C96) |  |  |  |  |  |  |
|  | No | Ref. |  | 0 | Ref. |  |
|  | Yes | 1.02 (0.60-1.72) |  | 1-6 | 1.09 (0.55-2.14) | 0.92 (0.70-1.21) |
|  |  |  |  | 7-12 | 1.03 (0.60-1.77) |  |
|  |  |  |  | >12 | 0.95 (0.52-1.75) |  |
| Leukaemia (C91-95) |  |  |  |  |  |  |
|  | No | Ref. |  | 0 | Ref. |  |
|  | Yes | 1.41 (0.64-3.07) |  | 1-6 | 1.22 (0.45-3.28) | 1.12 (0.79-1.57) |
|  |  |  |  | 7-12 | 1.50 (0.68-3.32) |  |
|  |  |  |  | >12 | 1.26 (0.51-3.08) |  |
| All others (NA) |  |  |  |  |  |  |
|  | No | Ref. |  | 0 | Ref. |  |
|  | Yes | 1.15 (0.82-1.61) |  | 1-6 | 0.96 (0.61-1.51) | 1.05 (0.89-1.23) |
|  |  |  |  | 7-12 | 1.21 (0.85-1.71) |  |
|  |  |  |  | >12 | 1.11 (0.75-1.64) |  |
| All sites (C00-97, D32-33, D42-43, D45-47) |  |  |  |  |  |  |
|  | No | Ref. |  | 0 | Ref. |  |
|  | Yes | 0.96 (0.88-1.04) |  | 1-6 | 0.99 (0.89-1.10) | 0.94 (0.90-0.98) |
|  |  |  |  | 7-12 | 0.96 (0.88-1.05) |  |
|  |  |  |  | >12 | 0.92 (0.83-1.01) |  |

The Cox regression model adjusted for age at enrollment (continuous), educational level (low, medium, high), marital status (married, others), smoking status (never, current, ever), alcohol drinking status (never, ever), regular exercise (no, yes), BMI (underweight, normal, overweight, obese), family history of cancer (no, yes), hypertension (no, yes), diabetes (no, yes), and age at menarche (<13, 13, 14, >14 years), and menopause status (no, yes).

For nulliparous female participants, the history of breastfeeding and total breastfeeding duration were considered as none/zero.

Abbreviations: HR, hazard ratio; CI, confidence interval.
